# Supplementary material for: Ultrathin 2D Titanium Carbide MXene (Ti3C2T x ) Nanoflakes Activate WNT/HIF‐1α‐Mediated Metabolism Reprogramming for Periodontal Regeneration
Source: PubMed Central journal article supplement — Adv Healthc Mater. 2021 Sep 29;10(22):2101215. doi: 10.1002/adhm.202101215 (PMC11468541; doi:10.1002/adhm.202101215), 2021-09-29
Supplement: ADHM-10-2101215-s001.pdf [file ADHM-10-2101215-s001.pdf]

**ADVANCED  
HEALTHCARE  
MATERIALS**

Supporting Information

for *Adv. Healthcare Mater.*, DOI: 10.1002/adhm.202101215

Ultrathin 2D Titanium Carbide MXene ( $\text{Ti}_3\text{C}_2\text{T}_x$ ) Nanoflakes  
Activate WNT/HIF-1 $\alpha$ -mediated Metabolism Reprogramming  
for Periodontal Regeneration

*Di Cui, Na Kong, Liang Ding, Yachong Guo\*\*\*, Wenrong Yang\*\*,  
Fuhua Yan\**

Supporting Information

**Ultrathin 2D Titanium Carbide MXene ( $Ti_3C_2T_x$ ) Nanoflakes Activate WNT/HIF-1 $\alpha$ -mediated Metabolism Reprogramming for Periodontal Regeneration**

*Di Cui, Na Kong, Liang Ding, Yachong Guo\*\*\*, Wenrong Yang\*\*, Fuhua Yan\**

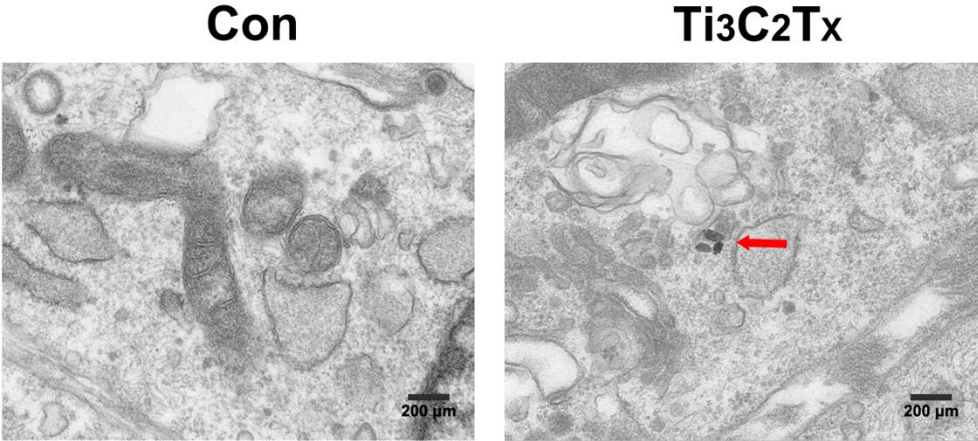

**Fig. S1. TEM images of hPDL cells incubated with  $Ti_3C_2T_x$  on day 7. The arrows indicate the internalized  $Ti_3C_2T_x$ .**

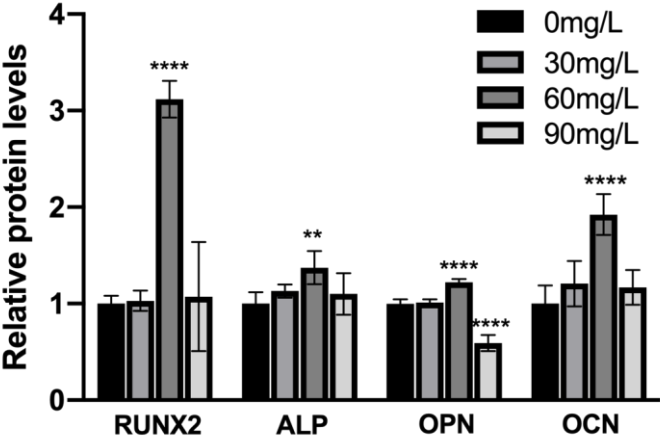

**Fig. S2. Relative protein levels of the osteogenic factors determined by western blots in hPDL cells stimulated with  $Ti_3C_2T_x$  on day 7.**

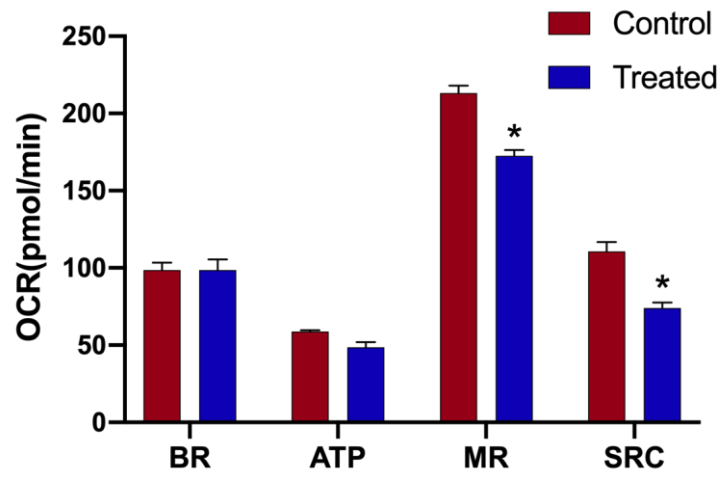

**Fig. S3. Real-time changes of the OCR in PDLSCs stimulated with  $Ti_3C_2T_x$  for 24 h.**

\*P<0.05, compared with Con.

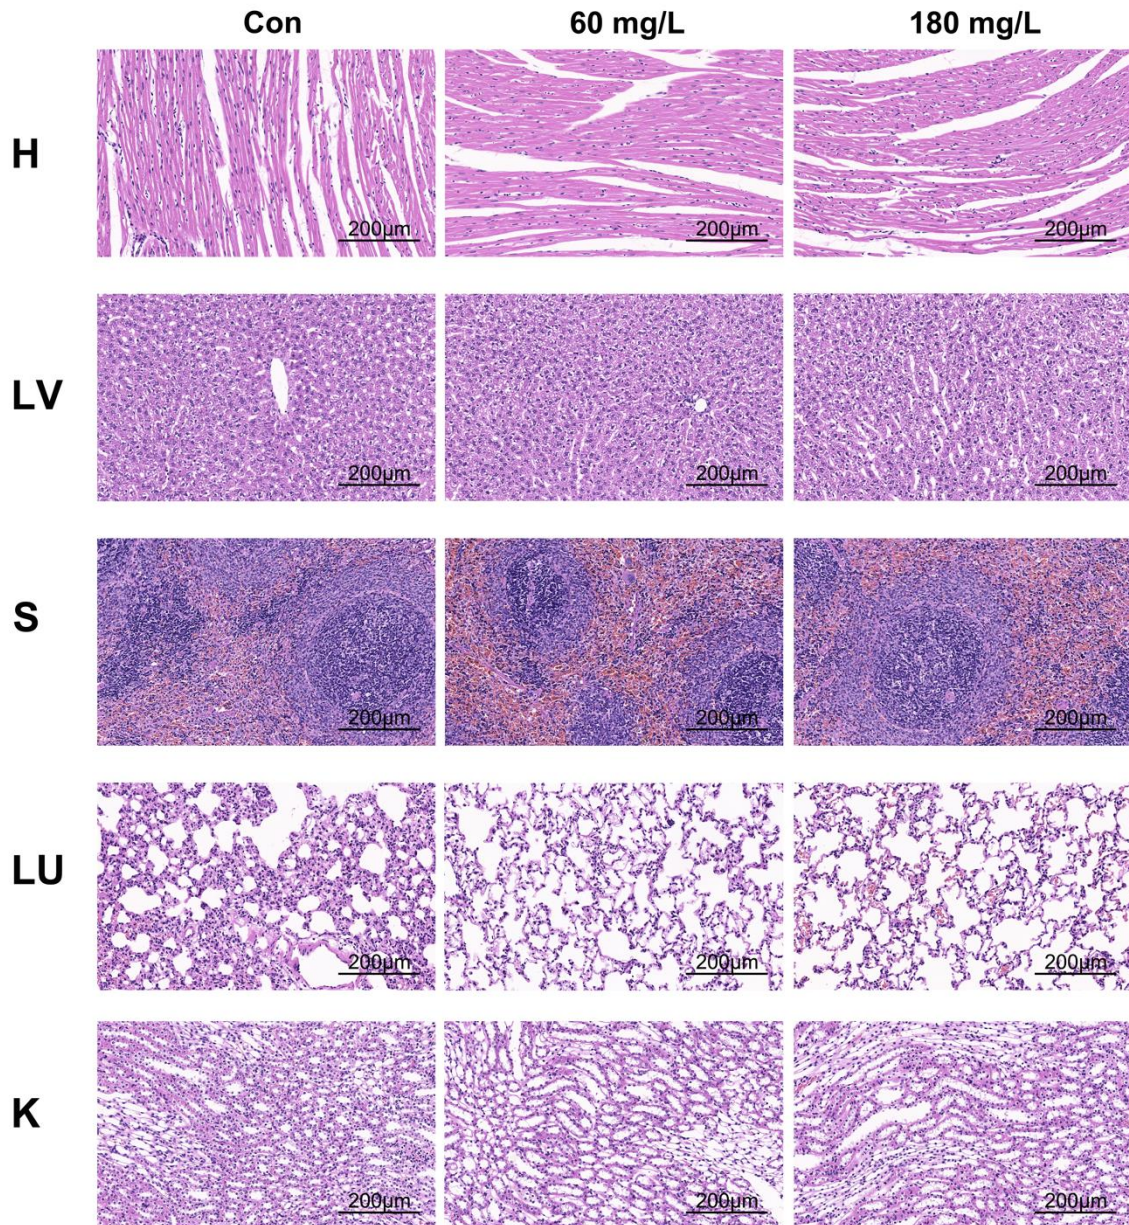

**Fig. S4. Representative histopathological images of the heart, liver, spleen, lungs and kidneys after exposure to  $Ti_3C_2T_x$  (60 and 180 mg/L).** The organs represent all the treatment groups and the control as no abnormalities were detected in all the groups due to the exposure to  $Ti_3C_2T_x$ .
